# Supplementary material for: Phase transition induced by an external electric field as a buffer to facilitate the initial decomposition of a series of catenated nitrogen energetic systems: a first-principles study
Source: Royal Society of Chemistry journal article supplement (doi:10.1039/d1cp05461a), 2022-01-01
Supplement: d1cp05461a1.pdf [file d1cp05461a1.pdf]

## Supplementary Information

### **Phase Transition Induced by External Electric Field as a Buffer to Facilitate the Initial Decomposition of Series of Catenated Nitrogen Energetic Systems: A First-Principles Study**

Xiaowei Wu<sup>a</sup>, Jianhua Xu<sup>b</sup>, Yunqiu Li<sup>c</sup>, Simin Zhu<sup>d</sup>, Wenshuai Dong<sup>a</sup>, Jian-Guo Zhang<sup>a\*</sup>

<sup>a</sup> *State Key Laboratory of Explosion Science and Technology, Beijing Institute of Technology, Beijing 100081, P. R. China*

<sup>b</sup> *Joint Laboratory of Advanced Biomedical Materials (NFU-UGent), College of Chemical Engineering, Nanjing Forestry University, Nanjing 210037, P. R. China*

<sup>c</sup> *Department of Safety Engineering, School of Chemical Engineering, Nanjing University of Science and Technology, Nanjing 210094, P. R. China*

<sup>d</sup> *China Fire And Rescue Institute, Beijing 102202, P. R. China*

---

\* Corresponding author. E-mail: zjgbit@bit.edu.cn

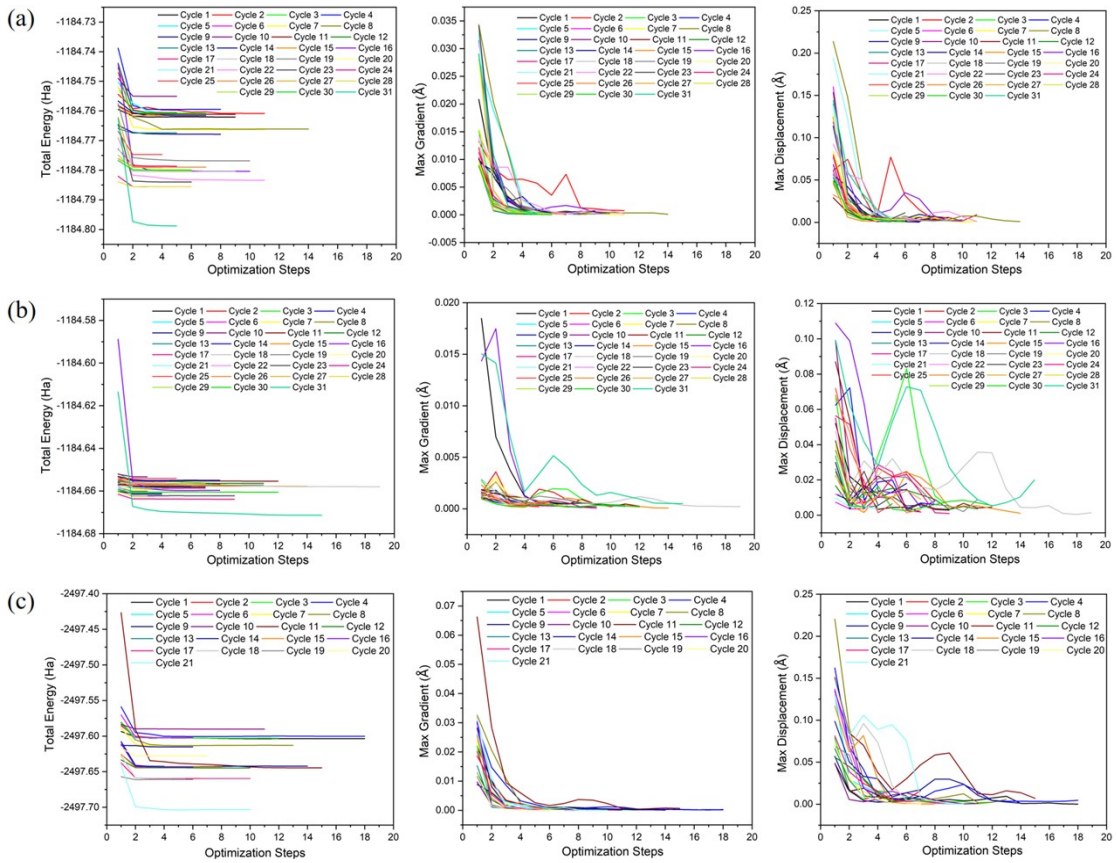

**Fig. S1.** Converged process of (a)  $N_4$ , (b)  $N_8$ , and (c)  $N_{10}$  during the cell optimization under the external electric field strength of 0.01 a.u..

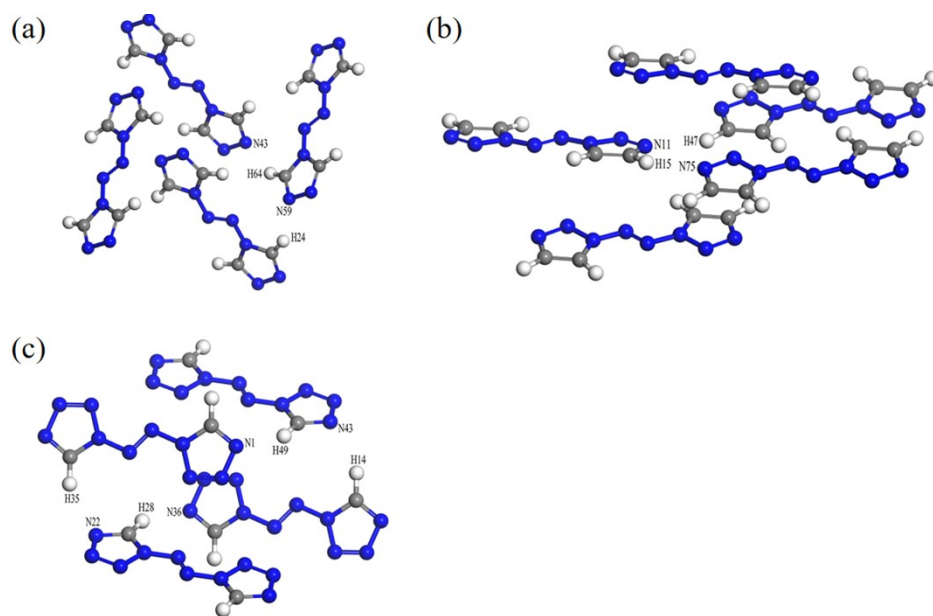

**Fig. S2.** Selected clusters from crystals (a) N<sub>4</sub>, (b) N<sub>8</sub>, and (c) N<sub>10</sub>.

**Table S1.** The deviations between the calculated and experimental lattice constants of  $N_4$ ,  $N_8$ , and  $N_{10}$ .

|          | $N_4$  |        |           | $N_8$   |         |           | $N_{10}$ |        |           |
|----------|--------|--------|-----------|---------|---------|-----------|----------|--------|-----------|
|          | calc.  | expt.  | deviation | calc.   | expt.   | deviation | calc.    | expt.  | deviation |
| <i>a</i> | 4.885  | 5.032  | 2.92%     | 7.321   | 7.488   | 2.23%     | 8.352    | 8.177  | 2.14%     |
| <i>b</i> | 6.497  | 6.498  | 0.02%     | 5.234   | 5.266   | 0.61%     | 6.672    | 6.835  | 2.38%     |
| <i>c</i> | 9.813  | 10.301 | 4.73%     | 8.674   | 9.131   | 5.00%     | 10.786   | 11.130 | 3.09%     |
| $\beta$  | 94.514 | 91.56  | 3.22%     | 110.053 | 112.604 | 2.27%     | 90.000   | 90.000 | 0.00%     |

**Table S2.**  $C_{ij}$  (GPa) of  $N_4$  with intensity of external electric field ranging from 0-0.01 a.u..

|       | $C_{11}$ | $C_{22}$ | $C_{33}$ | $C_{44}$ | $C_{55}$ | $C_{66}$ | $C_{12}$ | $C_{13}$ | $C_{23}$ |
|-------|----------|----------|----------|----------|----------|----------|----------|----------|----------|
| 0     | 32.67    | 38.02    | 23.77    | 26.81    | 13.56    | 9.5      | 18.51    | 16.75    | 21.13    |
| 0.001 | 31.39    | 34.98    | 21.72    | 25.53    | 12.88    | 9.16     | 18.22    | 15.76    | 19.32    |
| 0.002 | 31.15    | 33.89    | 20.94    | 25.06    | 12.68    | 8.95     | 18.3     | 15.48    | 18.68    |
| 0.003 | 30.6     | 31.9     | 19.5     | 24.16    | 12.26    | 8.68     | 18.36    | 14.97    | 17.45    |
| 0.004 | 29.54    | 29.03    | 17.18    | 22.48    | 11.53    | 8.36     | 18.35    | 14.24    | 15.44    |
| 0.005 | 27.37    | 25.14    | 13.98    | 19.52    | 10.43    | 8.17     | 17.54    | 13.23    | 12.43    |
| 0.006 | 23.41    | 21.25    | 10.91    | 14.83    | 8.69     | 8.07     | 16.05    | 11.85    | 8.76     |
| 0.007 | 21.41    | 19.8     | 9.7      | 13.18    | 7.94     | 7.54     | 14.86    | 10.85    | 7.62     |
| 0.008 | 19.83    | 19.49    | 8.91     | 12.55    | 7.39     | 6.92     | 14.08    | 10.24    | 7.06     |
| 0.009 | 20.92    | 20.19    | 9.46     | 13.12    | 7.69     | 7.22     | 15.33    | 11.27    | 8        |
| 0.01  | 19.75    | 18.14    | 8.73     | 12.5     | 7.1      | 7.06     | 13.01    | 9.2      | 6.95     |

**Table S3.**  $C_{ij}$  (GPa) of  $N_8$  with intensity of external electric field ranging from 0-0.01 a.u..

|       | $C_{11}$ | $C_{22}$ | $C_{33}$ | $C_{44}$ | $C_{55}$ | $C_{66}$ | $C_{12}$ | $C_{13}$ | $C_{23}$ |
|-------|----------|----------|----------|----------|----------|----------|----------|----------|----------|
| 0     | 48.15    | 32.17    | 21.34    | -2.21    | 8.38     | 4.77     | 23.23    | 19.05    | 11.38    |
| 0.001 | 45.9     | 30.69    | 18.52    | -2.25    | 7.54     | 4.43     | 22.77    | 17.64    | 10.99    |
| 0.002 | 44.73    | 30.85    | 18.12    | -2.06    | 7.36     | 4.54     | 22.59    | 17.21    | 10.85    |
| 0.003 | 44.76    | 29.19    | 16.11    | -2.98    | 7.17     | 3.56     | 22.25    | 16.87    | 10.7     |
| 0.004 | 43.42    | 28.8     | 14.79    | -2.99    | 7.19     | 3.47     | 22.1     | 16.31    | 10.41    |
| 0.005 | 40.78    | 28.14    | 12.5     | -3.01    | 6.7      | 3.2      | 21.7     | 15.41    | 9.84     |
| 0.006 | 38.26    | 27.1     | 10       | -2.71    | 6.51     | 3.06     | 21.28    | 14.09    | 9.07     |
| 0.007 | 34.07    | 24.66    | 6.34     | -2.86    | 6.3      | 2.38     | 19.59    | 12.48    | 6.33     |
| 0.008 | 28.49    | 26.17    | 3.48     | -1.26    | 6.8      | 2.54     | 17.04    | 11.6     | 8.48     |
| 0.009 | 26.03    | 26.65    | 2.87     | -0.83    | 6.86     | 2.58     | 16.39    | 10.99    | 6.09     |
| 0.01  | 31.55    | 29.21    | 6.95     | -2.03    | 7.1      | 2.58     | 19.27    | 13.22    | 9.26     |

**Table S4.**  $C_{ij}$  (GPa) of  $N_{10}$  with intensity of external electric field ranging from 0-0.01 a.u..

|       | $C_{11}$ | $C_{22}$ | $C_{33}$ | $C_{44}$ | $C_{55}$ | $C_{66}$ | $C_{12}$ | $C_{13}$ | $C_{23}$ |
|-------|----------|----------|----------|----------|----------|----------|----------|----------|----------|
| 0     | 17.25    | 25.35    | 24.62    | 15.34    | 8.55     | 10.78    | 12.17    | 14.74    | 19.34    |
| 0.001 | 17.65    | 25.12    | 24.31    | 15.28    | 8.73     | 10.95    | 12.73    | 15.13    | 19       |
| 0.002 | 17.67    | 24.51    | 23.33    | 15.04    | 8.57     | 10.94    | 13.17    | 15.14    | 18.37    |
| 0.003 | 18.06    | 23.35    | 20.95    | 14.25    | 8.16     | 10.85    | 14.32    | 15.29    | 16.99    |
| 0.004 | 16.91    | 21.32    | 17.26    | 12.91    | 7.27     | 10.42    | 14.12    | 14.08    | 14.52    |
| 0.005 | 19.67    | 19.04    | 11.69    | 10.92    | 6.52     | 10.25    | 16.35    | 14.17    | 10.56    |
| 0.006 | 18.96    | 19.05    | 10.77    | 10.3     | 5.68     | 9.99     | 16.08    | 13.26    | 10.47    |
| 0.007 | 17.1     | 17.54    | 9.29     | 9.27     | 4.95     | 9.16     | 14.91    | 11.85    | 9.5      |
| 0.008 | 19.45    | 18.88    | 10.63    | 10.37    | 5.85     | 10.01    | 16.65    | 13.46    | 10.18    |
| 0.009 | 17.49    | 17.28    | 9.52     | 9.42     | 5.31     | 9.23     | 15.14    | 12.25    | 9.27     |
| 0.01  | 18.31    | 17.35    | 10.75    | 10.45    | 6.6      | 9.4      | 15.94    | 13.3     | 9.05     |
